# Supplementary material for: Competition alters predicted forest carbon cycle responses to nitrogen availability and elevated CO 2 : simulations using an explicitly competitive, game-theoretic vegetation demographic model
Source: Copernicus journal article supplement (doi:10.5194/bg-2019-55), 2019-02-18
Supplement: Supplementary file 1 [file bg-2019-55-supplement.pdf]

1 **Supplementary Information**

2 **Competition alters predicted forest carbon cycle responses to nitrogen availability and**  
3 **elevated CO<sub>2</sub>: simulations using an explicitly competitive, game-theoretic vegetation**  
4 **demographic model**

5 Ensheng Weng<sup>1,2</sup>, Ray Dybzinski<sup>3</sup>, Caroline E. Farrior<sup>4</sup>, Stephen W. Pacala<sup>5</sup>

6 <sup>1</sup>Center for Climate Systems Research, Columbia University, New York, NY 10025

7 <sup>2</sup>NASA Goddard Institute for Space Studies, 2880 Broadway, New York, NY 10025

8 <sup>3</sup>Institute of Environmental Sustainability, Loyola University Chicago, Chicago, IL 60660

9 <sup>4</sup>Department of Integrative Biology, University of Texas at Austin, Austin, TX 78712

10 <sup>5</sup>Department of Ecology & Evolutionary Biology, Princeton University, Princeton, NJ 08544,

11 Email: [wengensheng@gmail.com](mailto:wengensheng@gmail.com); Phone: 212-678-5585

12

13 **Table of contents:**

14 **Figure S1 Monoculture runs at ambient [CO<sub>2</sub>] (380 ppm)**

15 **Figure S2 Monoculture runs at elevated [CO<sub>2</sub>] (580 ppm)**

16 **Figure S3 Critical height of polyculture and monoculture runs at ambient (380 ppm) and**  
17 **elevated [CO<sub>2</sub>] (580 ppm)**

18 **Figure S4 Successional patterns at ambient [CO<sub>2</sub>] (380 ppm)**

19 **Figure S5 Successional patterns at elevated [CO<sub>2</sub>] (580 ppm)**

20

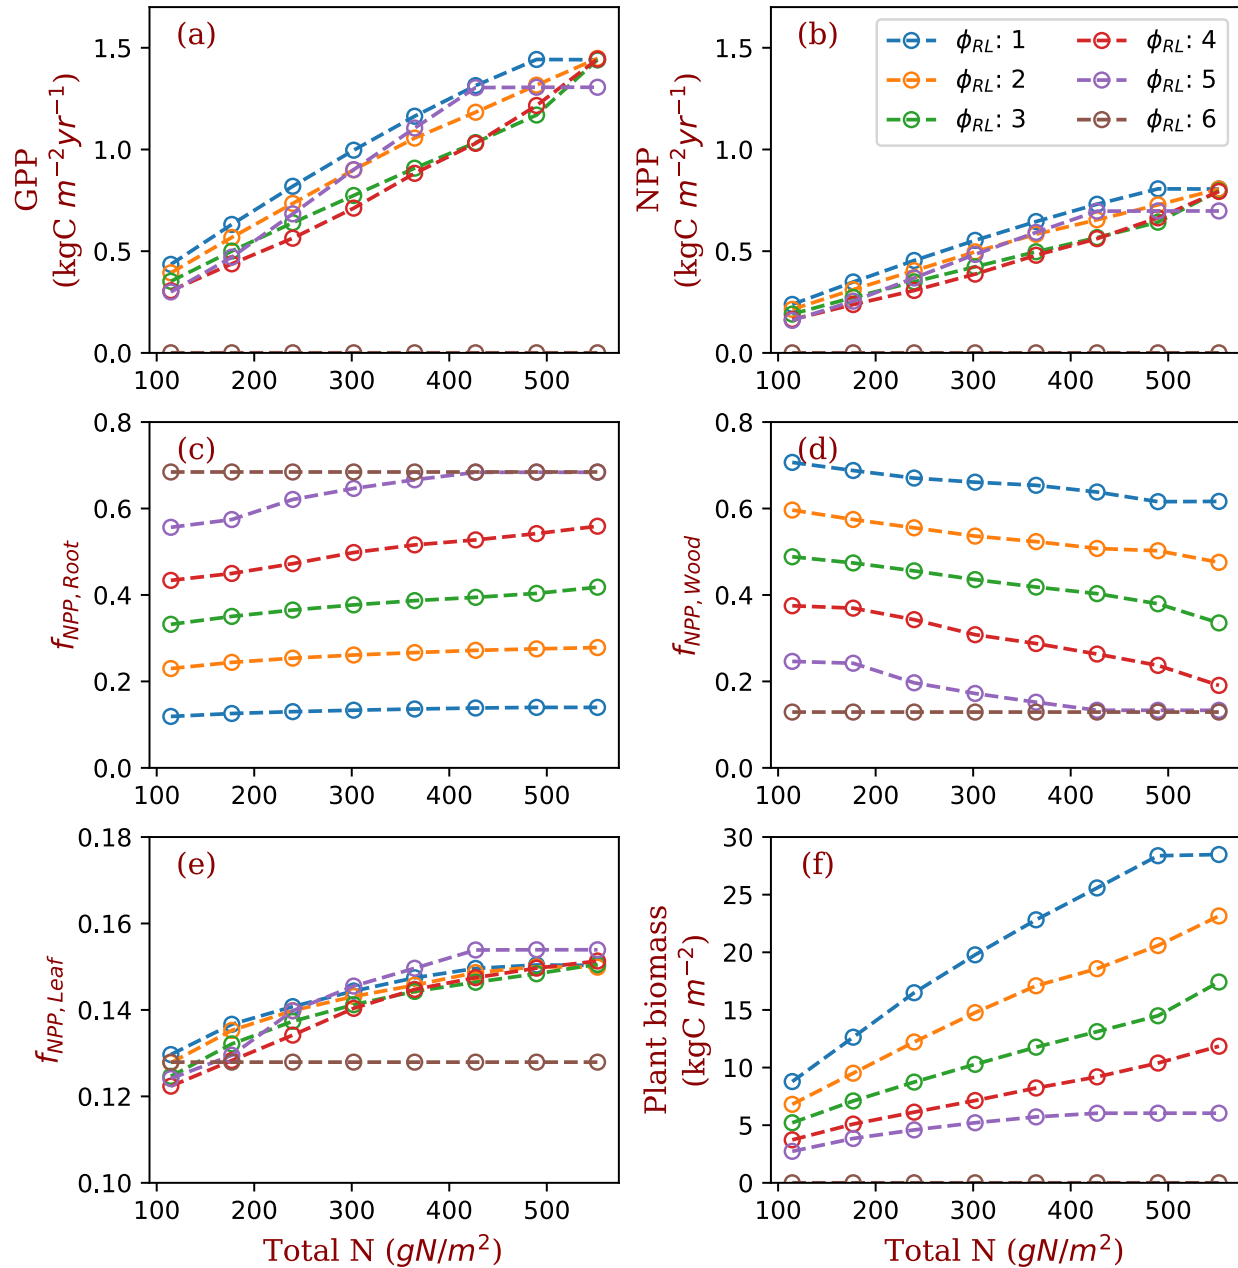

21

22

**Figure S1 Fixed-allocation runs at ambient  $[CO_2]$  (380 ppm)**

23

GPP: Gross primary production; NPP: Net primary production;  $f_{NPP,x}$ : the fraction of NPP

24

allocated to x, where x can be Root (fine roots), Leaf (leaves in crown), and Wood (including

25

tree trunk, stems, and coarse roots). The data are from the averages of the model run years from

26

1400 and 1800. Each model run is initiated with one PFT with fixed ratio of fine root area to leaf

27

area ( $\phi_{RL}$ ).

28

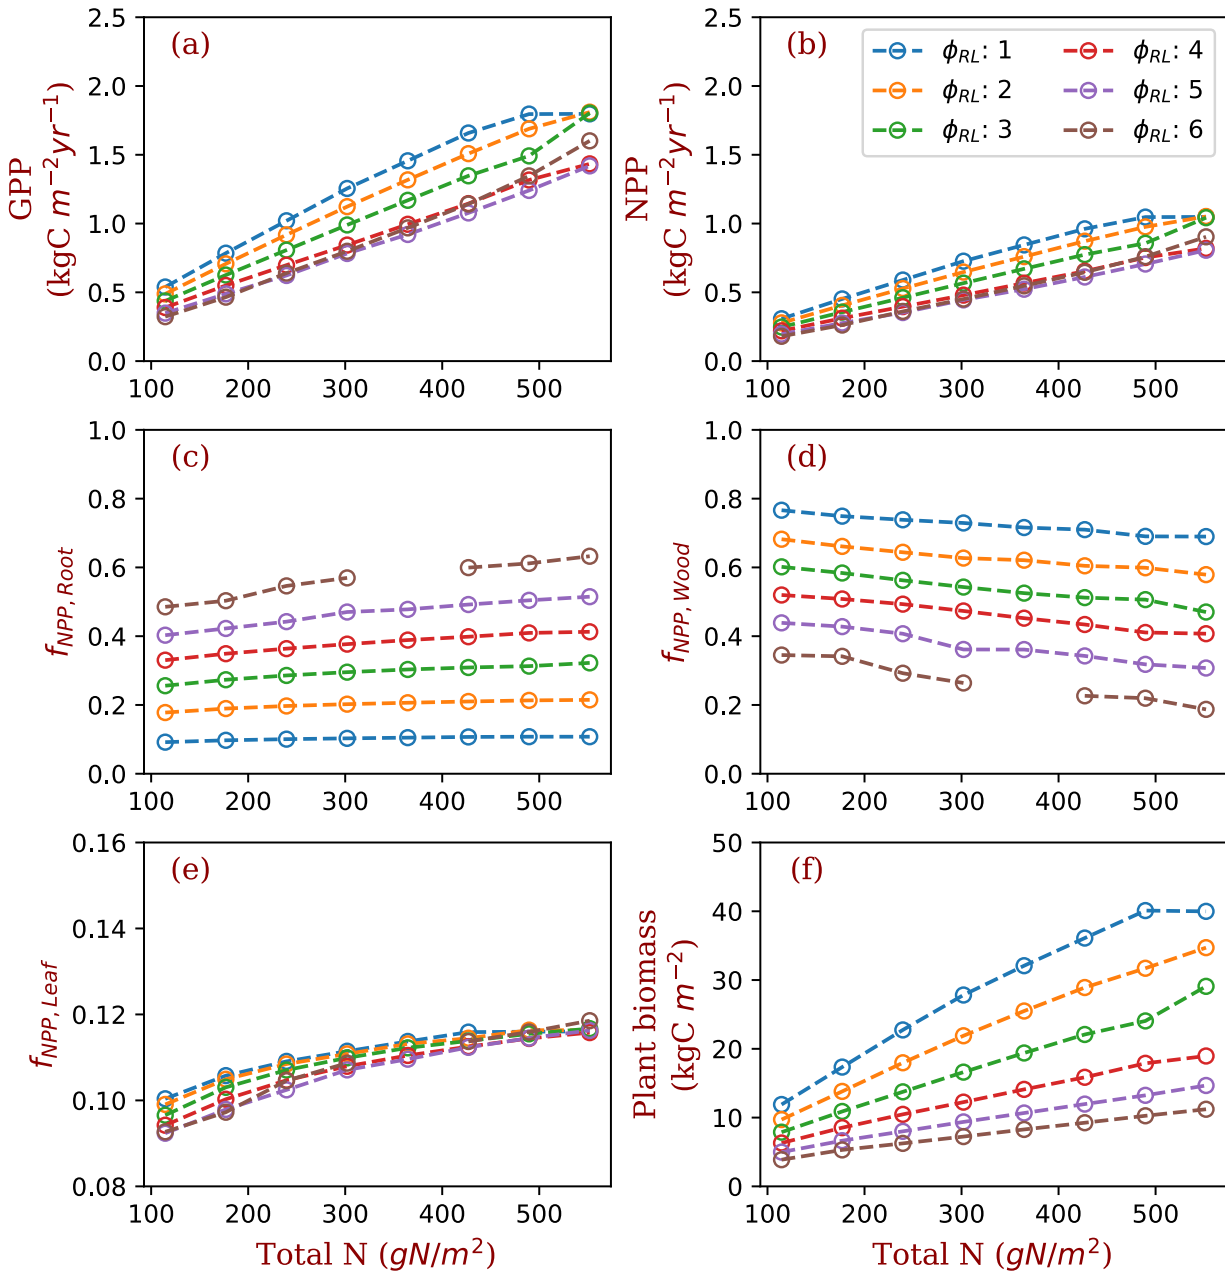

30

31 **Figure S2 Monoculture runs at elevated  $[CO_2]$ (580 ppm).** GPP: Gross primary production;  
 32 NPP: Net primary production;  $f_{NPP,x}$ : the fraction of NPP allocated to x, where x can be Root  
 33 (fine roots), Leaf (leaves in crown), and Wood (including tree trunk, stems, and coarse roots).  
 34 The data are from the averages of the model run years from 1400 and 1800. Each model run is  
 35 initiated with one PFT with fixed ratio of fine root area to leaf area ( $\phi_{RL}$ ).

36

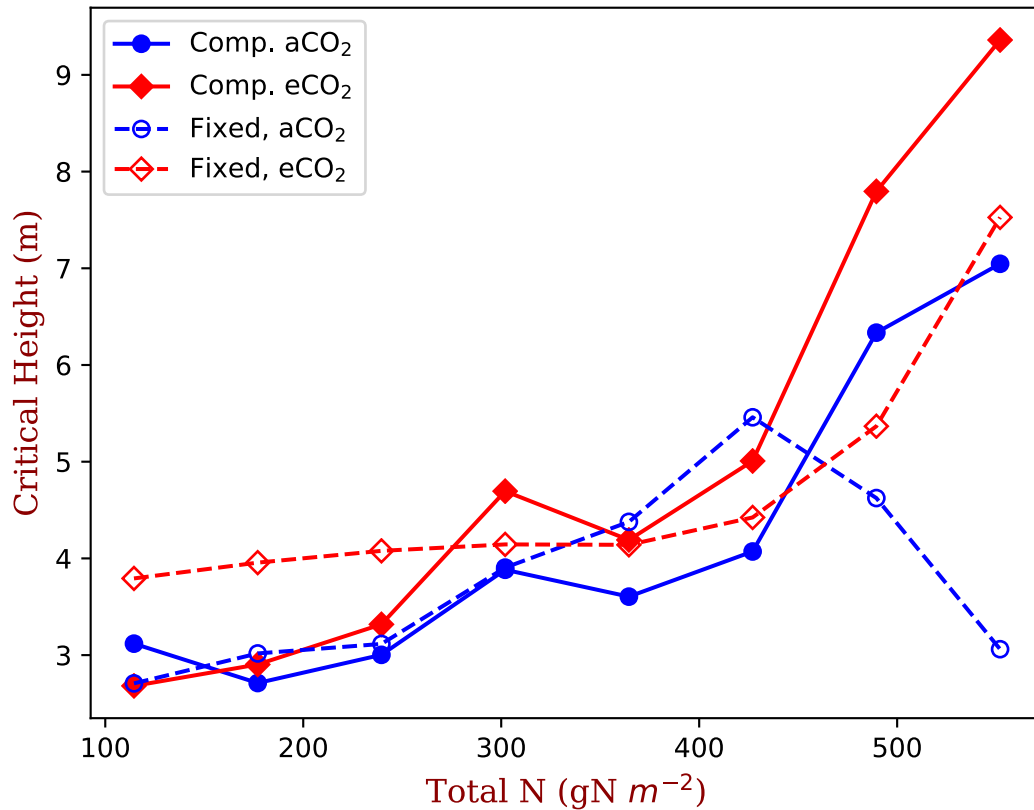

37

38 **Figure S3 Critical height of competition and fixed-allocation runs at the two [CO<sub>2</sub>] levels**  
 39 **(380 ppm and 580 ppm).** The figure shows the data of the averages of the model run years from  
 40 1400 and 1800 of the model runs. The closed symbols with solid line represent competition runs  
 41 (comp.). The open symbols with dashed lines represent fixed-allocation runs (only the runs of  
 42  $\phi_{RL}=4$ ).

43

44

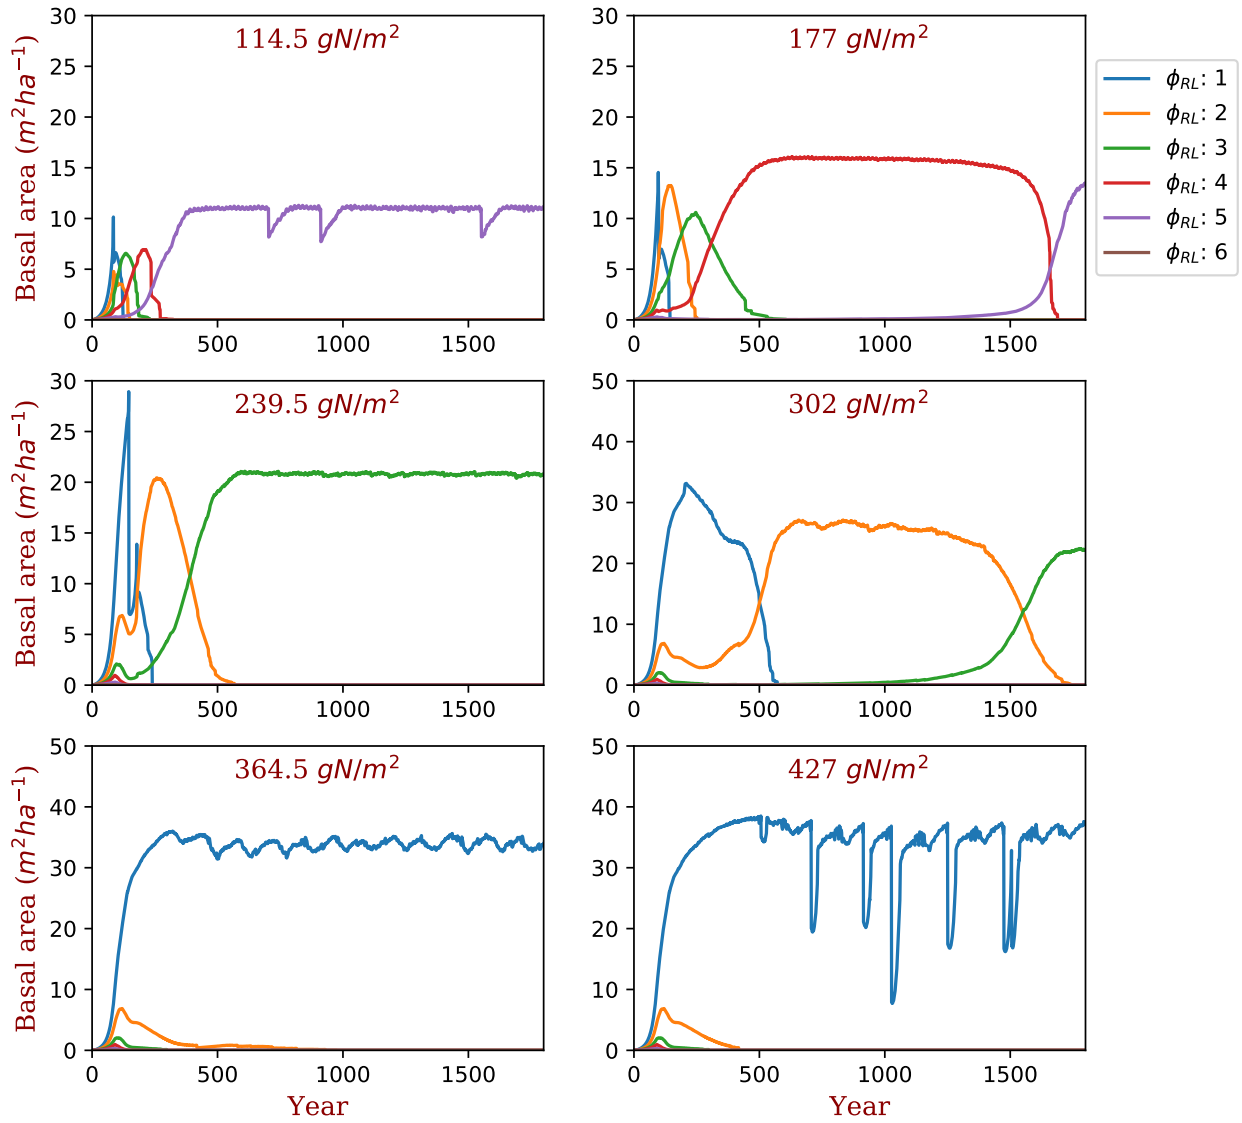

45

46

**Figure S4 Successional patterns at ambient [CO<sub>2</sub>] (380 ppm).**

47

48

49

50

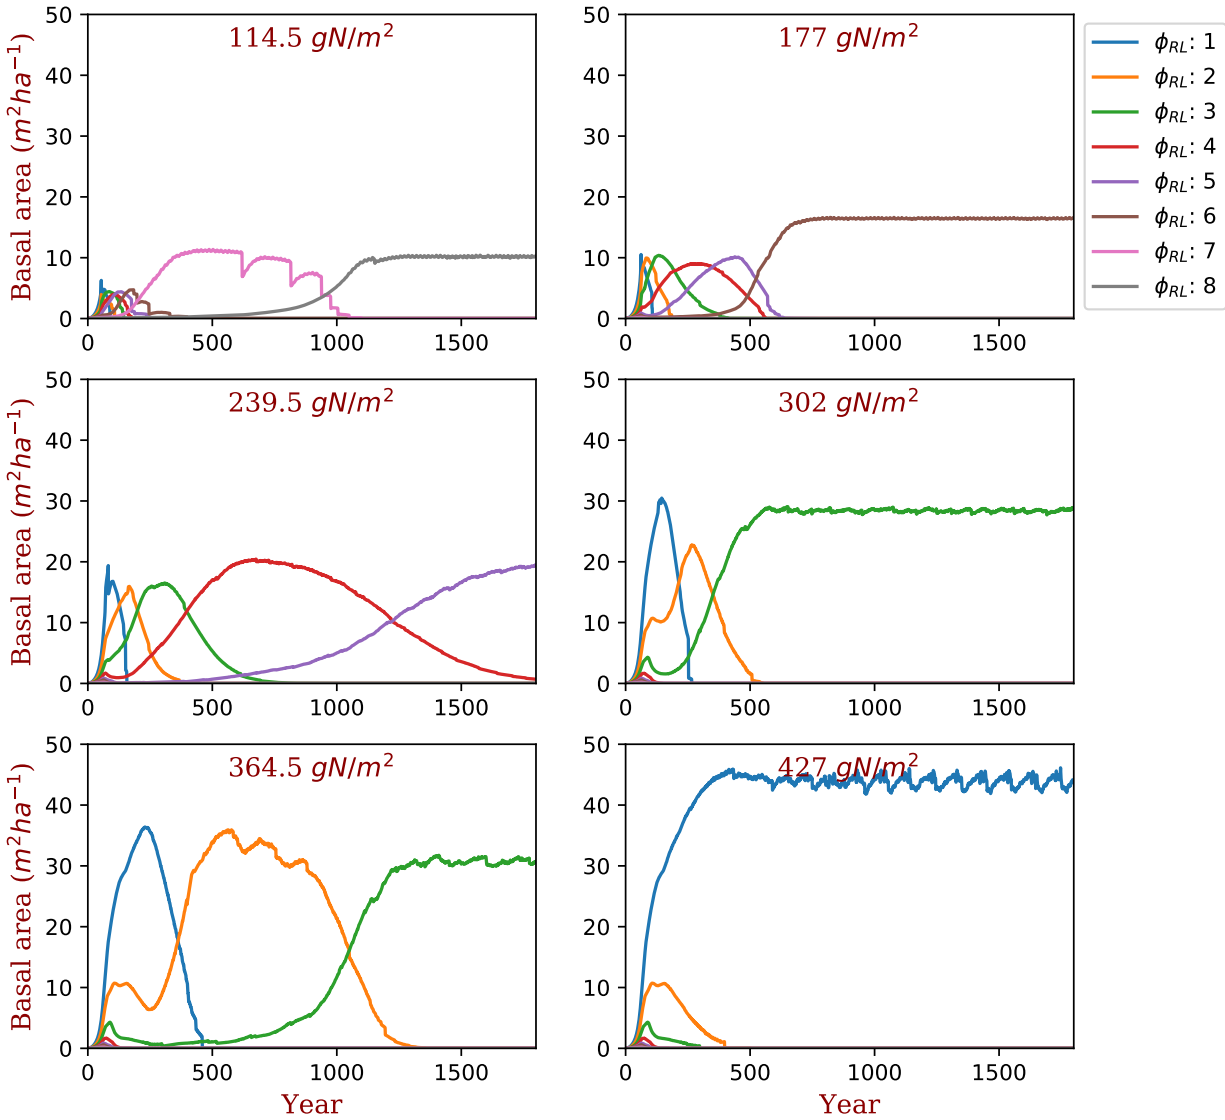

51

52 **Figure S5 Successional patterns at elevated [CO<sub>2</sub>] (580 ppm).**

53
